# Supplementary material
Source: PubMed Central journal article supplement (PMC7897317)
Supplement: NIHMS1663890-supplement-2.pdf [file NIHMS1663890-supplement-2.pdf]

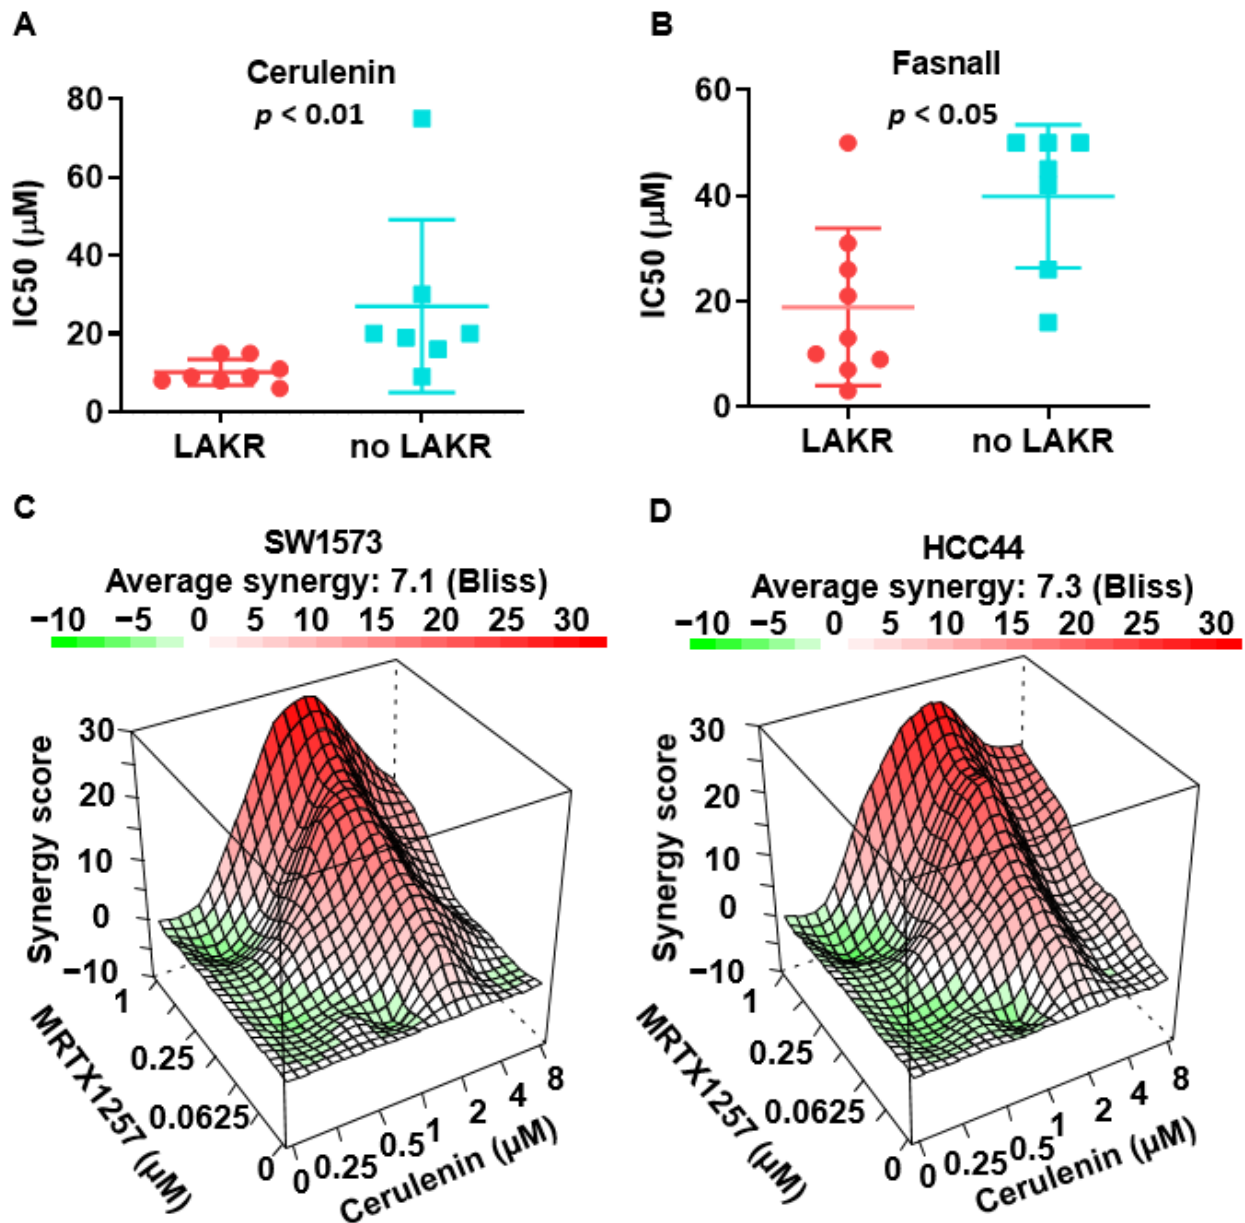

**Figure S2:**  $KRAS^{G12C}$  LAKR non-small lung adenocarcinoma cell lines are sensitive to FASN inhibition. (A and B)  $KRAS^{G12C}$  non-small lung adenocarcinoma cell lines were treated by FASN inhibitors, Cerulenin or Fasnall, and cell viability was measured at 48 hours. (C and D) The  $KRAS^{G12C}$  inhibitor MRTX1257 and FASN inhibitor Cerulenin are synergistic in SW1573 and HCC44. Synergy between MRTX1257 and Cerulenin was assessed by measuring cell viability at 48 hours. Synergistic scores were computed by R synergyfinder package.
