# Supplementary material
Source: PubMed Central journal article supplement (PMC7897317)
Supplement: NIHMS1663890-supplement-3.pdf [file NIHMS1663890-supplement-3.pdf]

**A**  
SW1573 Average synergy: 4.1 (Bliss)

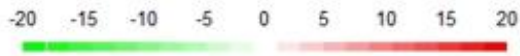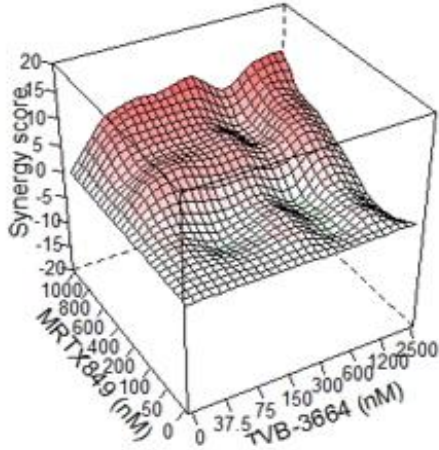

**B**  
H358 Average synergy: -16.5 (Bliss)

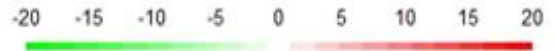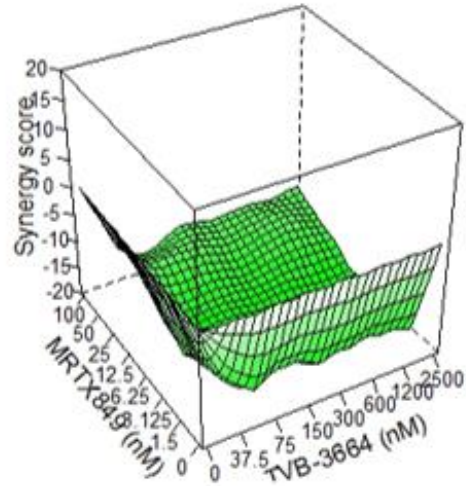

**C**  
H460 Average synergy: 0 (Bliss)

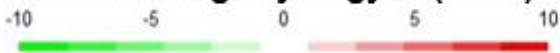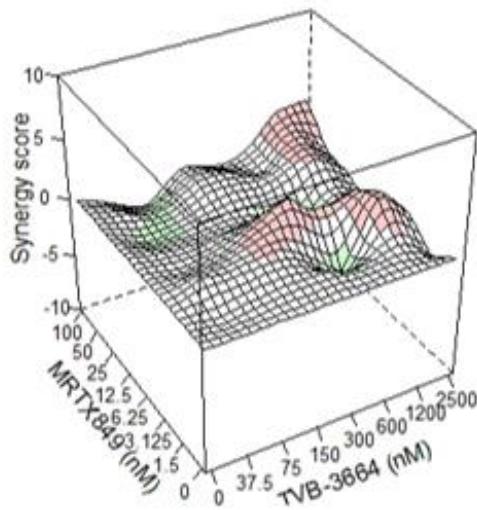

**Figure S3:** The  $KRAS^{G12C}$  inhibitor MRTX849 and FASN inhibitor TVB-3664 are synergistic in LUAD cells lines with  $KRAS^{G12C}$  LAKR. (A)  $KRAS^{G12C}$  LAKR positive cell line; (B)  $KRAS^{G12C}$  LAKR negative cell line; (C)  $KRAS^{Q61H}$  LAKR positive cell line.
