# Supplementary material
Source: PubMed Central journal article supplement (PMC7897317)
Supplement: NIHMS1663890-supplement-5.pdf [file NIHMS1663890-supplement-5.pdf]

**Table S1.** KRAS mutation and LAKR status of cell lines used in the study.

| <b>LUAD cell lines</b> | <b>KRAS Status</b> | <b>LAKR Status</b> |
|------------------------|--------------------|--------------------|
| H1155                  | Q61H               | positive           |
| H650                   | Q61L               | positive           |
| H2122                  | G12C               | positive           |
| H2030                  | G12C               | positive           |
| HCC44                  | G12C               | positive           |
| SW1573                 | G12C               | positive           |
| H1373                  | G12C               | positive           |
| H460                   | Q61H               | positive           |
| Calu-6                 | Q61K               | negative           |
| Calu-1                 | G12C               | negative           |
| H23                    | G12C               | negative           |
| H358                   | G12C               | negative           |
| H1792                  | G12C               | negative           |
| H1573                  | G12A               | negative           |
| H441                   | G12V               | negative           |

\*LUAD cell lines with KRAS mutations that were homozygous for the mutations were scored as LAKR “positive”, while lines with KRAS mutations and KRAS wild type sequences (heterozygous for KRAS allele) were scored as LAKR “negative”.
