# Supplementary material
Source: PubMed Central journal article supplement (PMC7897317)

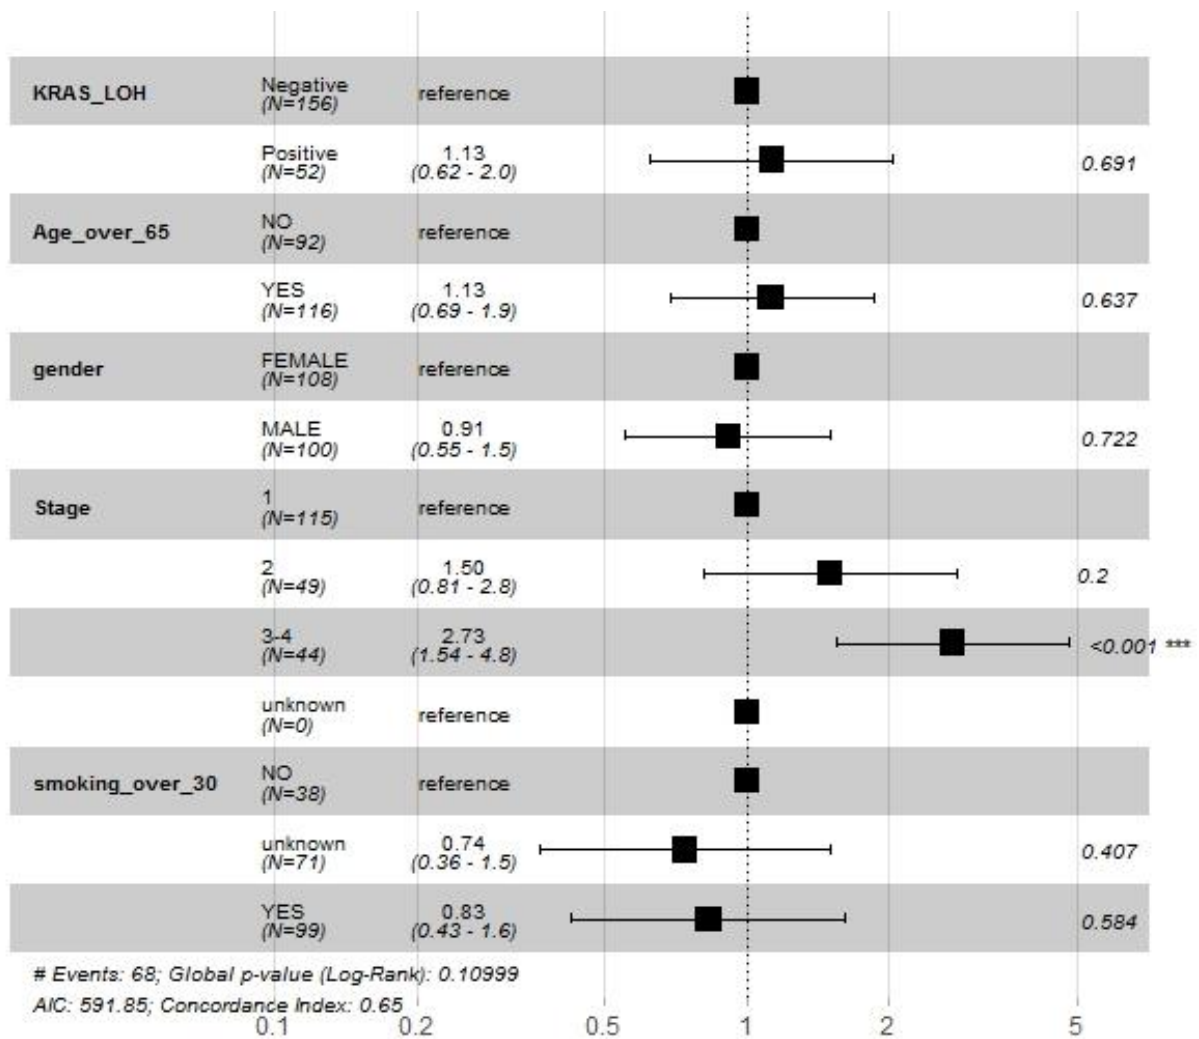

Fig S1: Hazard ratios of clinical factors of patients with KRASWT LUAD.

Supplement: NIHMS1663890-supplement-1.pdf [file NIHMS1663890-supplement-1.pdf]

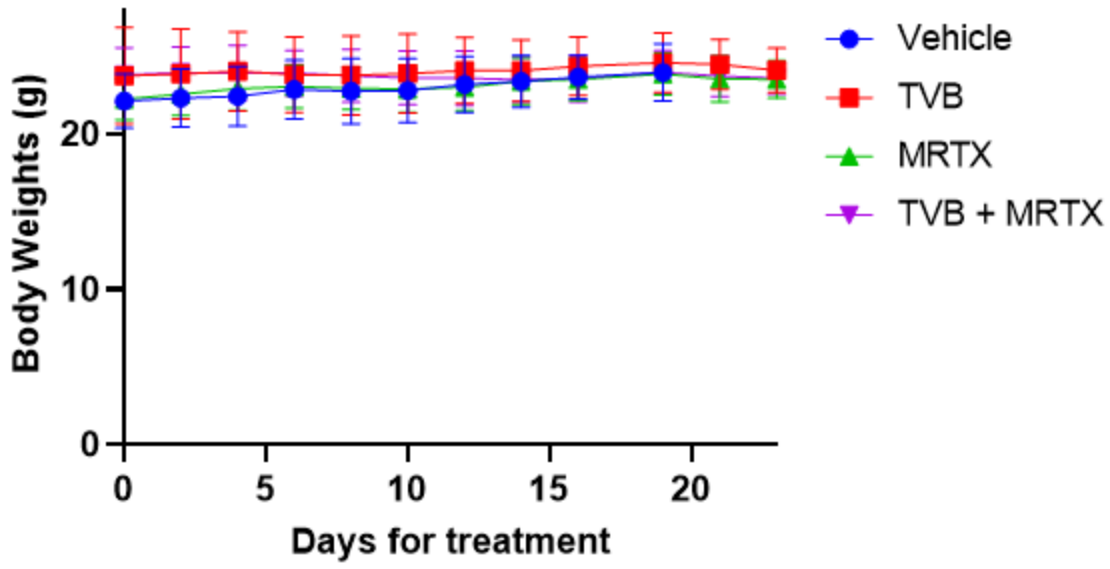

**Figure S4:** Average weight of mice in combination therapy trial (Fig. 3D).

Supplement: NIHMS1663890-supplement-4.pdf [file NIHMS1663890-supplement-4.pdf]
